# Supplementary material for: Process dependent interface strengthening, de-icing and EMI shielding performance in PEEK/CF laminates
Source: Royal Society of Chemistry journal article supplement (doi:10.1039/d3ma00318c), 2023-01-01
Supplement: d3ma00318c1.pdf [file d3ma00318c1.pdf]

## Process dependent interface strengthening, de-icing and EMI shielding performance in PEEK/CF laminates

Rishi Raj<sup>a</sup>, Sampath Parasuram<sup>a</sup>, S. Kumar<sup>a</sup>, Suryasarathi Bose<sup>a\*</sup>

<sup>a</sup>Department of Materials Engineering, Indian Institute of Science, Bangalore, India - 560012

(\*Corresponding Author Email: [sbose@iisc.ac.in](mailto:sbose@iisc.ac.in))

### Recyclability Studies:

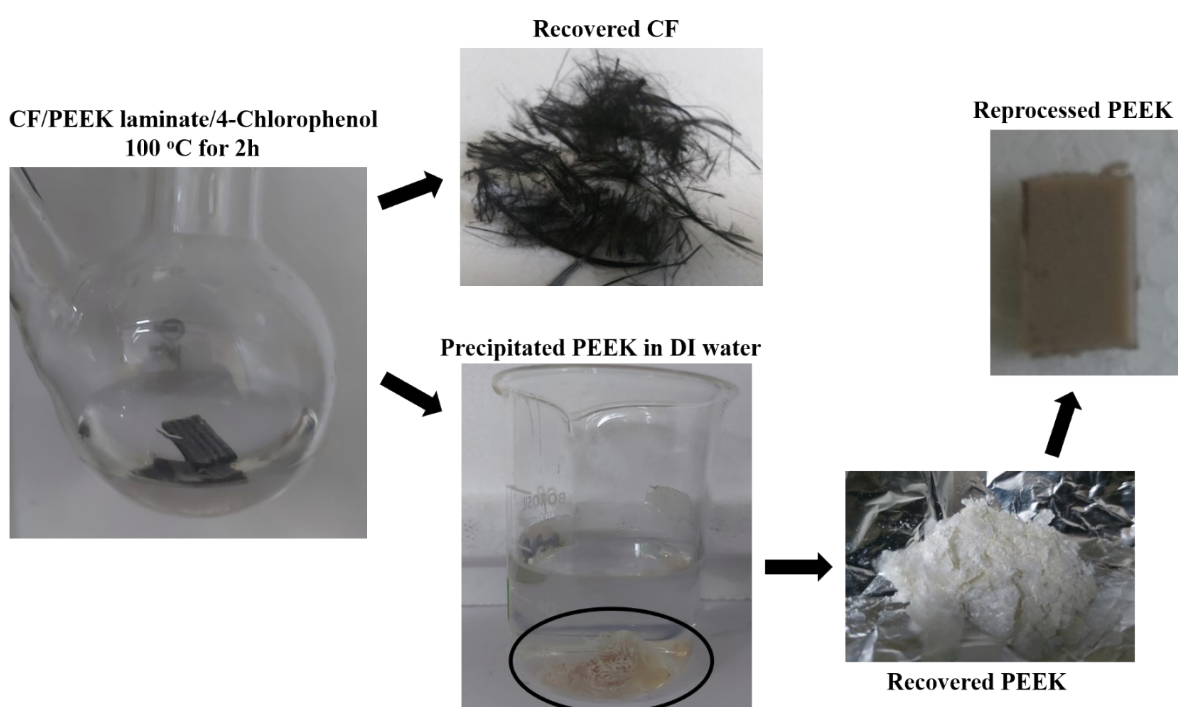

Figure S1: Recyclability process of CF/PEEK

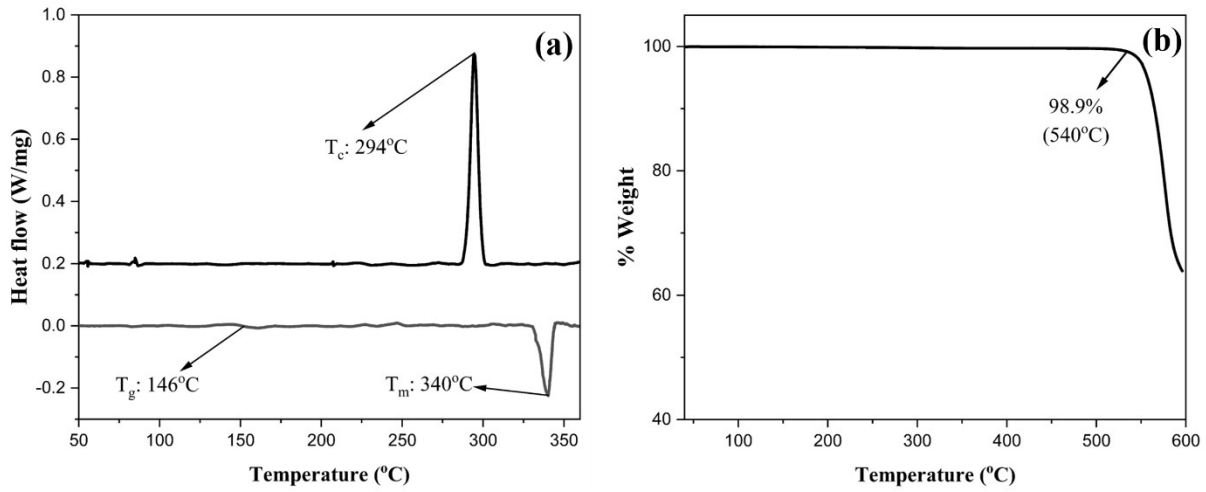

Figure S2: (a) DSC thermogram of PEEK, (b) TGA plot of PEEK

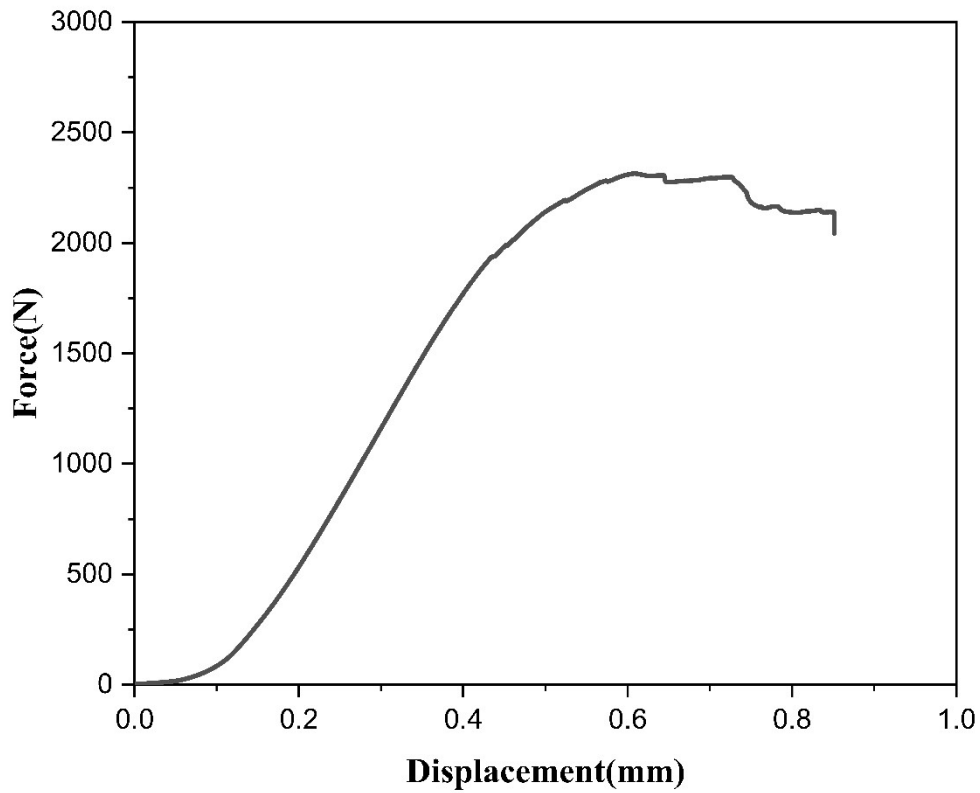

Figure S3: Representative Load vs displacement plot of sample L4.

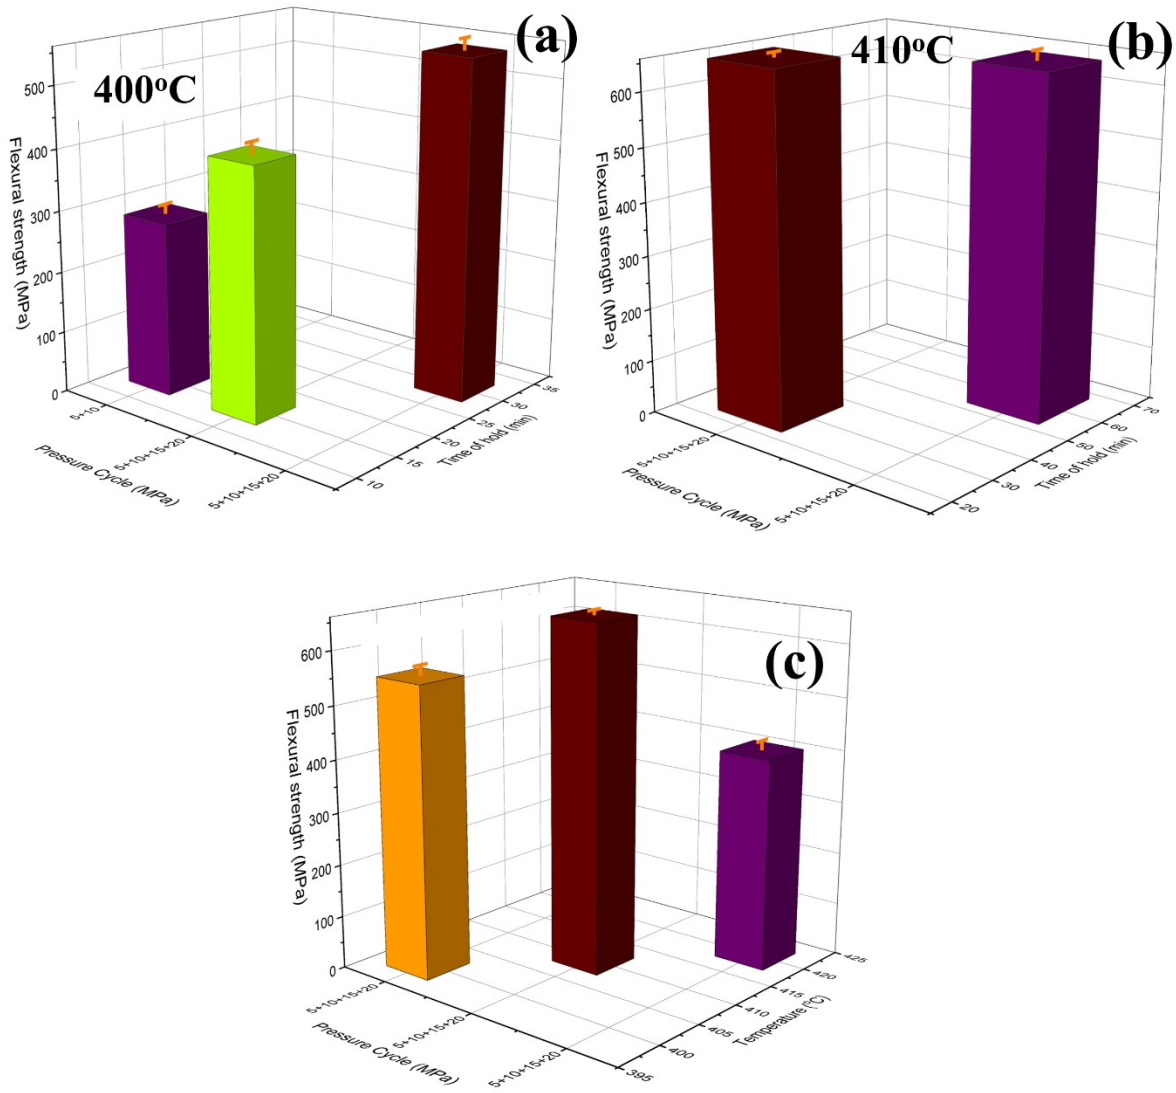

Figure S4: FS values of CF/PEEK laminates (a) Variation of pressure cycle and holding time at 400°C; (b) variation of holding time at 400°C; (c) variation of processing temperature for 5+10+15+20MPa pressure cycle and 30min holding time.
